# Supplementary material for: Are Countries Regulating Veterinary Drug Residues That Are Important to Human Health?
Source: Research Square preprint supplement (doi:10.21203/rs.3.rs-6506349/v1), 2025-05-09
Supplement: Supplementary file 1 [file 422beccb9be6f4fe2af74560.docx]

**Supplementary Appendices for**

**Are Countries Regulating Veterinary Drug Residues That Are Important to Human Health?**

Akinbode Okunola1,2, Elliott Dennis1,2,*, and Matthew Hille3

1Institute of Agriculture and Natural Resources, University of Nebraska-Lincoln, Lincoln, NE, USA

2National Institute of Antimicrobial Resistance Research and Education (NIAMRRE), Ames, IA, USA

3School of Veterinary Medicine and Biomedical Sciences, University of Nebraska-Lincoln, USA.

***Corresponding Author Information**

208A Filley Hall

University of Nebraska-Lincoln

Lincoln, NE 68583-0922

[elliott.dennis@unl.edu](mailto:elliott.dennis@unl.edu)

**Appendix A**


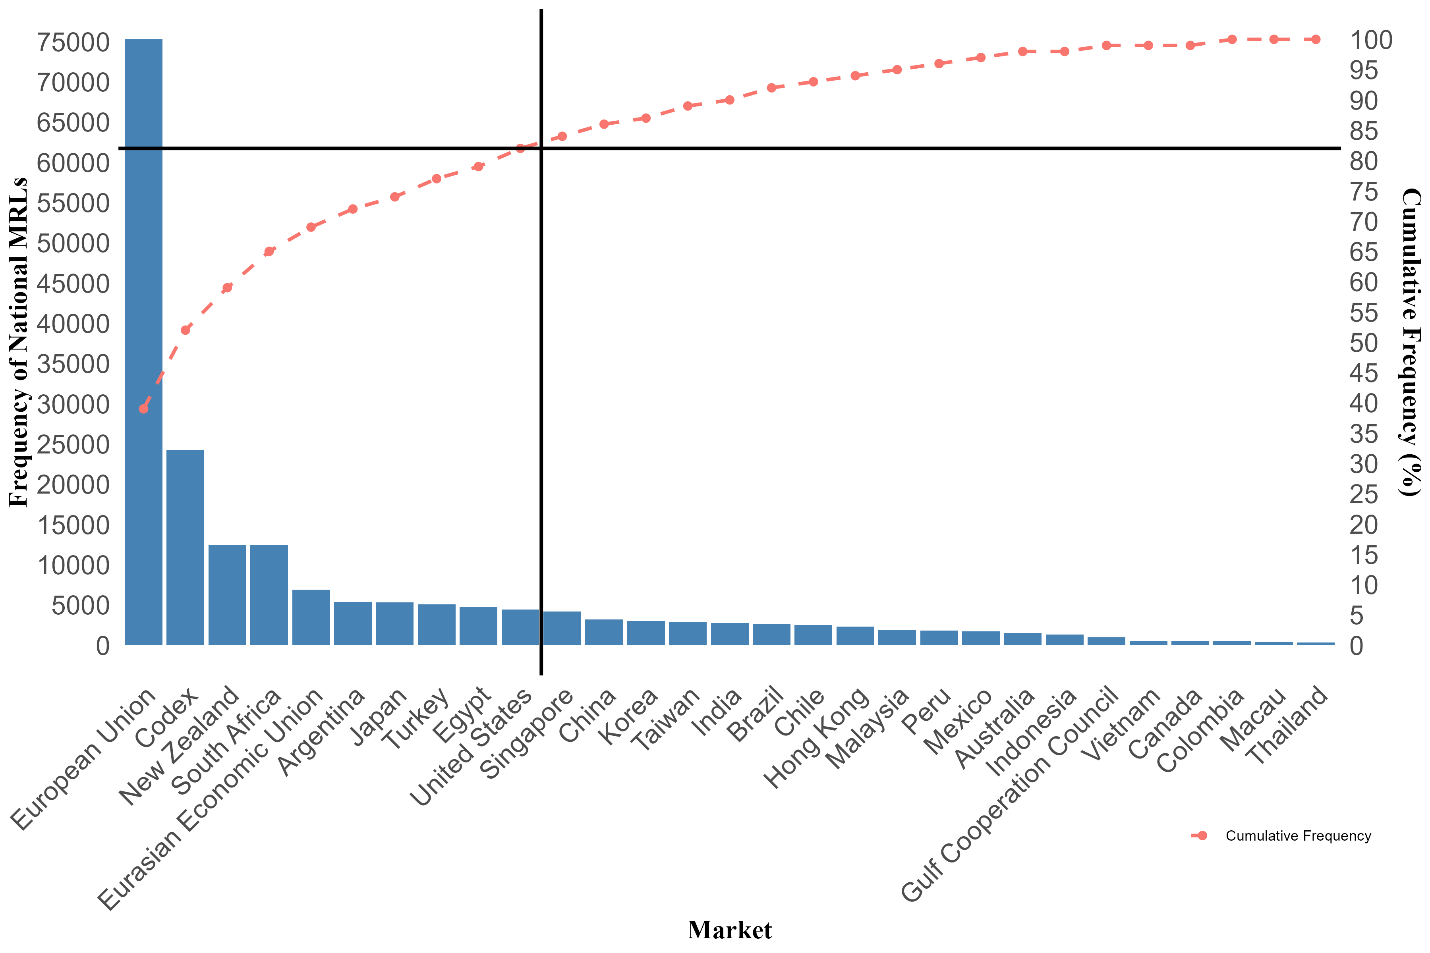
**Figure A1. Surveillance of medically important antimicrobials across countries.** In this figure, the MRLs pairs of countries that defer to Codex, EU and U.S. MRLs are added to the country of origin. Accounting for the deferrals allows us to see the global influence of these leading regulators.

**Table A2. Share of national MRL pairs by medical importance for each country**

| **Market** | **H1V1** | **H1V2** | **H1V3** | **H2V1** | **H2V2** | **H2V3** | **H3V1** | **H3V2** | **H3V3** | **H4V1** | **H4V2** | **H4V3** |
| --- | --- | --- | --- | --- | --- | --- | --- | --- | --- | --- | --- | --- |
| Argentina | 9.94(531) | 4.58(245) | 0(0) | 15.19(812) | 3.07(164) | 0(0) | 60.48(3232) | 3.01(161) | 0.32(17) | 2.34(125) | 1.07(57) | 0(0) |
| Australia | 0.4(6) | 0(0) | 0(0) | 35.36(529) | 0(0) | 0(0) | 45.52(681) | 6.89(103) | 2.74(41) | 6.08(91) | 3.01(45) | 0(0) |
| Brazil | 12.08(322) | 5.36(143) | 0(0) | 21.01(560) | 3.15(84) | 0(0) | 50.83(1355) | 3.38(90) | 1.28(34) | 0.94(25) | 1.99(53) | 0(0) |
| Canada | 4.91(26) | 0(0) | 0(0) | 30.94(164) | 0(0) | 0(0) | 54.72(290) | 2.83(15) | 1.89(10) | 0.94(5) | 3.77(20) | 0(0) |
| Chile | 5.35(134) | 1.36(34) | 0(0) | 8.86(222) | 0.04(1) | 0(0) | 79.1(1983) | 1(25) | 0.32(8) | 0.88(22) | 3.11(78) | 0(0) |
| China | 13.43(430) | 1.91(61) | 0(0) | 16.31(522) | 0(0) | 0(0) | 62.82(2011) | 2(64) | 1(32) | 0.56(18) | 1.97(63) | 0(0) |
| Codex | 4.38(21) | 3.55(17) | 0(0) | 27.97(134) | 0(0) | 0(0) | 57.41(275) | 2.92(14) | 0(0) | 3.76(18) | 0(0) | 0(0) |
| Colombia | 4.15(21) | 3.36(17) | 0(0) | 26.28(133) | 0(0) | 0(0) | 59.09(299) | 3.56(18) | 0(0) | 3.56(18) | 0(0) | 0(0) |
| Egypt | 12.55(595) | 5.23(248) | 0(0) | 18.12(859) | 1.79(85) | 0(0) | 55.27(2620) | 3.84(182) | 0(0) | 2.64(125) | 0.55(26) | 0(0) |
| Eurasian Economic Union | 14.56(1006) | 4.4(304) | 0(0) | 21.65(1496) | 0.01(1) | 0(0) | 51.11(3532) | 2.76(191) | 0(0) | 2.94(203) | 2.58(178) | 0(0) |
| European Union | 12.02(623) | 4.79(248) | 0(0) | 19.09(989) | 1.68(87) | 0(0) | 54.89(2844) | 3.84(199) | 0.6(31) | 2.41(125) | 0.68(35) | 0(0) |
| Gulf Cooperation Council | 14.62(139) | 1.47(14) | 0(0) | 26.29(250) | 0(0) | 0(0) | 47.11(448) | 4(38) | 1.16(11) | 3.15(30) | 2.21(21) | 0(0) |
| Hong Kong | 4.2(96) | 2.27(52) | 0(0) | 9.23(211) | 0(0) | 0(0) | 79.7(1822) | 1.27(29) | 0.13(3) | 1.27(29) | 1.92(44) | 0(0) |
| India | 12.53(346) | 1.48(41) | 0(0) | 9.96(275) | 0(0) | 0(0) | 51.99(1436) | 6.12(169) | 5.79(160) | 0.65(18) | 11.48(317) | 0(0) |
| Indonesia | 7.47(99) | 2.49(33) | 0(0) | 22.17(294) | 0(0) | 0(0) | 54.07(717) | 2.94(39) | 2.49(33) | 2.94(39) | 5.43(72) | 0(0) |
| Japan | 9.76(517) | 5.91(313) | 0(0) | 26.53(1405) | 3.1(164) | 0(0) | 44.14(2337) | 1.32(70) | 2.3(122) | 2.3(122) | 4.63(245) | 0(0) |
| Korea | 21.08(629) | 3.52(105) | 0(0) | 20.07(599) | 0.17(5) | 0(0) | 44.27(1321) | 5.13(153) | 1.31(39) | 0.87(26) | 3.59(107) | 0(0) |
| Macau | 5.03(20) | 4.27(17) | 0(0) | 14.57(58) | 0(0) | 0(0) | 69.35(276) | 2.26(9) | 0(0) | 4.52(18) | 0(0) | 0(0) |
| Malaysia | 2.17(40) | 1.9(35) | 0(0) | 11.21(207) | 0(0) | 0(0) | 81.8(1510) | 0.33(6) | 1.68(31) | 0.7(13) | 0.22(4) | 0(0) |
| Mexico | 14.21(240) | 5.68(96) | 0(0) | 17.47(295) | 0(0) | 0(0) | 62.64(1058) | 0(0) | 0(0) | 0(0) | 0(0) | 0(0) |
| New Zealand | 14.47(1804) | 5.26(656) | 0(0) | 23.69(2952) | 1.32(164) | 0(0) | 38.15(4755) | 9.21(1148) | 1.32(164) | 1.32(164) | 5.26(656) | 0(0) |
| Peru | 11.75(614) | 4.75(248) | 0(0) | 19.41(1014) | 0.04(2) | 0(0) | 56.78(2967) | 3.06(160) | 0.69(36) | 2.45(128) | 1.07(56) | 0(0) |
| Singapore | 9.48(400) | 4.55(192) | 0(0) | 32.27(1362) | 0(0) | 0(0) | 40.88(1725) | 7.91(334) | 0.33(14) | 3.86(163) | 0.71(30) | 0(0) |
| South Africa | 14.47(1804) | 5.26(656) | 0(0) | 23.69(2952) | 1.32(164) | 0(0) | 38.15(4755) | 9.21(1148) | 1.32(164) | 1.32(164) | 5.26(656) | 0(0) |
| Taiwan | 3.49(102) | 5.99(175) | 0(0) | 27.6(806) | 0(0) | 0(0) | 52.71(1539) | 4.52(132) | 0.17(5) | 2.57(75) | 2.95(86) | 0(0) |
| Thailand | 6.25(21) | 4.76(16) | 0(0) | 30.06(101) | 0(0) | 0(0) | 49.4(166) | 4.17(14) | 0(0) | 5.36(18) | 0(0) | 0(0) |
| Turkey | 11.81(600) | 4.84(246) | 0(0) | 19.18(974) | 1.67(85) | 0(0) | 55.6(2824) | 3.37(171) | 0.49(25) | 2.46(125) | 0.57(29) | 0(0) |
| United States | 6.94(30) | 0(0) | 0(0) | 25.23(109) | 0(0) | 0(0) | 50.46(218) | 2.55(11) | 3.24(14) | 3.94(17) | 7.64(33) | 0(0) |
| Vietnam | 5.46(30) | 4.01(22) | 0(0) | 30.05(165) | 0(0) | 0(0) | 53.19(292) | 3.28(18) | 0(0) | 4.01(22) | 0(0) | 0(0) |

Source: Authors’ compilation. In parenthesis is the number of MRL pairs in each medical importance level for every country. The sum across the row gives the total percentage and number of national MRL pairs for each country.


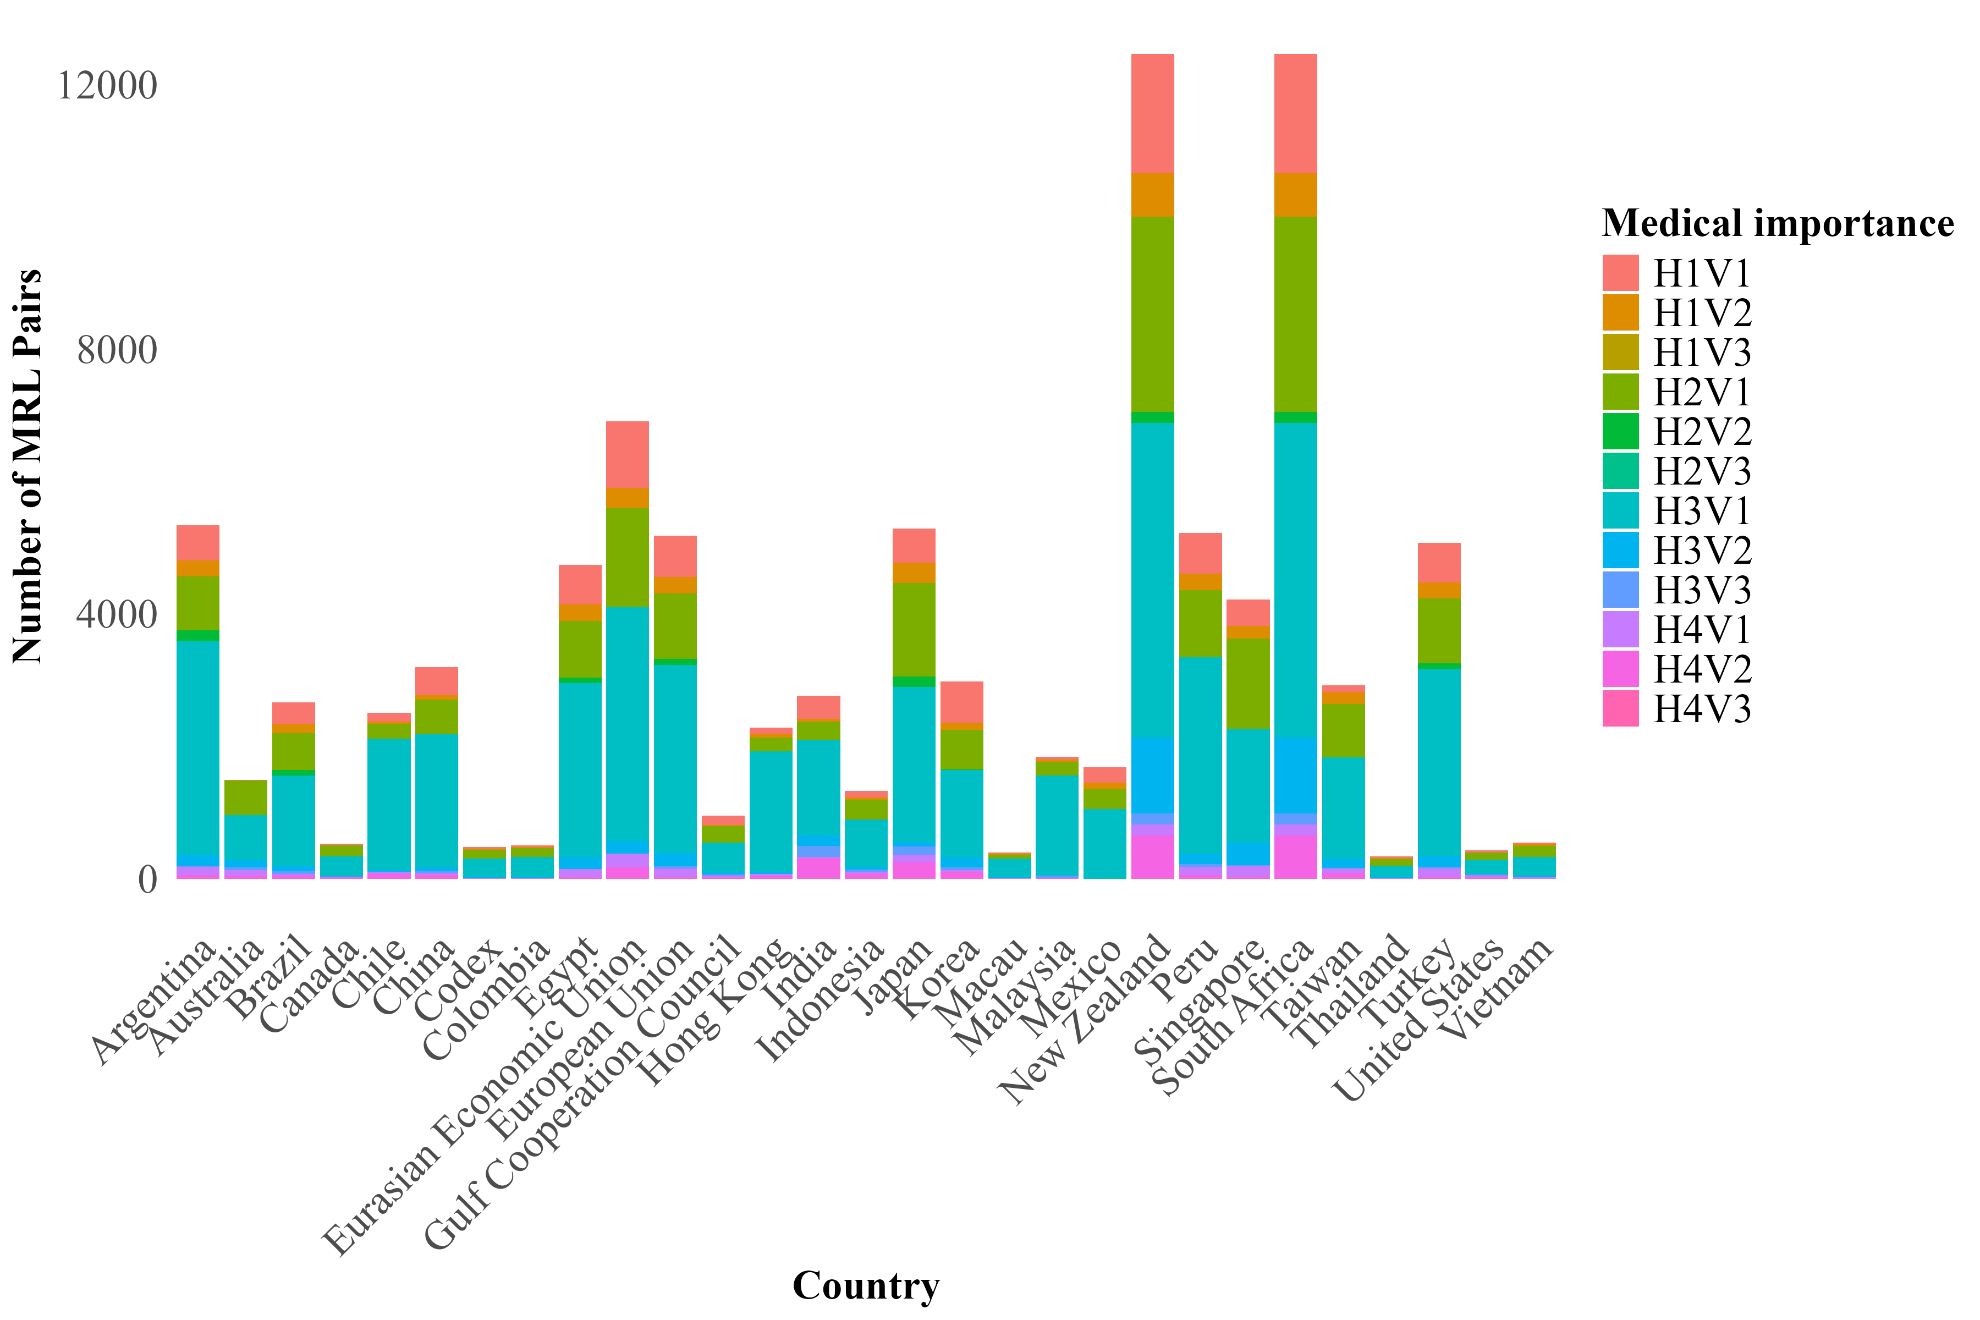


**Figure A3. Medically important antimicrobials by country.**

Note, these are MRL specific to each country. The deferral MRL pairs are not accounted for in the frequency of origin countries. The regulatory behavior of countries of origin directly reflects those of the countries that depend on them.

**Table A4. List of countries and full deferral countries**

| **Non-deferral countries** | | **Codex deferral countries** | | **EU deferral countries** | **US deferral countries** |
| --- | --- | --- | --- | --- | --- |
| Argentina | Malaysia | Afghanistan | Lebanon | Algeria | American Samoa |
| Australia | Mexico | Angola | Libya | French West Indies | Guam |
| Brazil | New Zealand | Bahamas | Malawi | Georgia | Northern Mariana Islands |
| Canada | Nicaragua | Barbados | Mozambique | Montenegro | Puerto Rico |
| Chile | Peru | Belize | Myanmar | Suriname | U.S. Virgin Islands |
| China | Singapore | Bermuda | Nigeria | United Kingdom |  |
| Colombia | South Africa | Bosnia and Herzegovina | Pakistan |  |  |
| Costa Rica | Taiwan | British Virgin Islands | Papua New Guinea |  |  |
| Dominican Republic | Thailand | Cambodia | Senegal |  |  |
| Egypt | Turkey | Cameroon | Sint Maarten |  |  |
| El Salvador | United States | Cayman Islands | Sudan |  |  |
| Eurasian Economic Union | Vietnam | Cuba | Syria |  |  |
| European Union |  | Dominica Republic | Tanzania |  |  |
| Guatemala |  | Eswatini | Tonga |  |  |
| Gulf Cooperation Council |  | Fiji | Trinidad and Tobago |  |  |
| Honduras |  | Gambia | Tunisia |  |  |
| Hong Kong |  | Ghana | Uganda |  |  |
| India |  | Grenada | Venezuela |  |  |
| Indonesia |  | Haiti | Zimbabwe |  |  |
| Japan |  | Jamaica | Panama |  |  |
| Korea |  | Jordan | Uruguay |  |  |
| Macau |  | Kenya |  |  |  |

Source: Authors’ compilation.

**Appendix B**


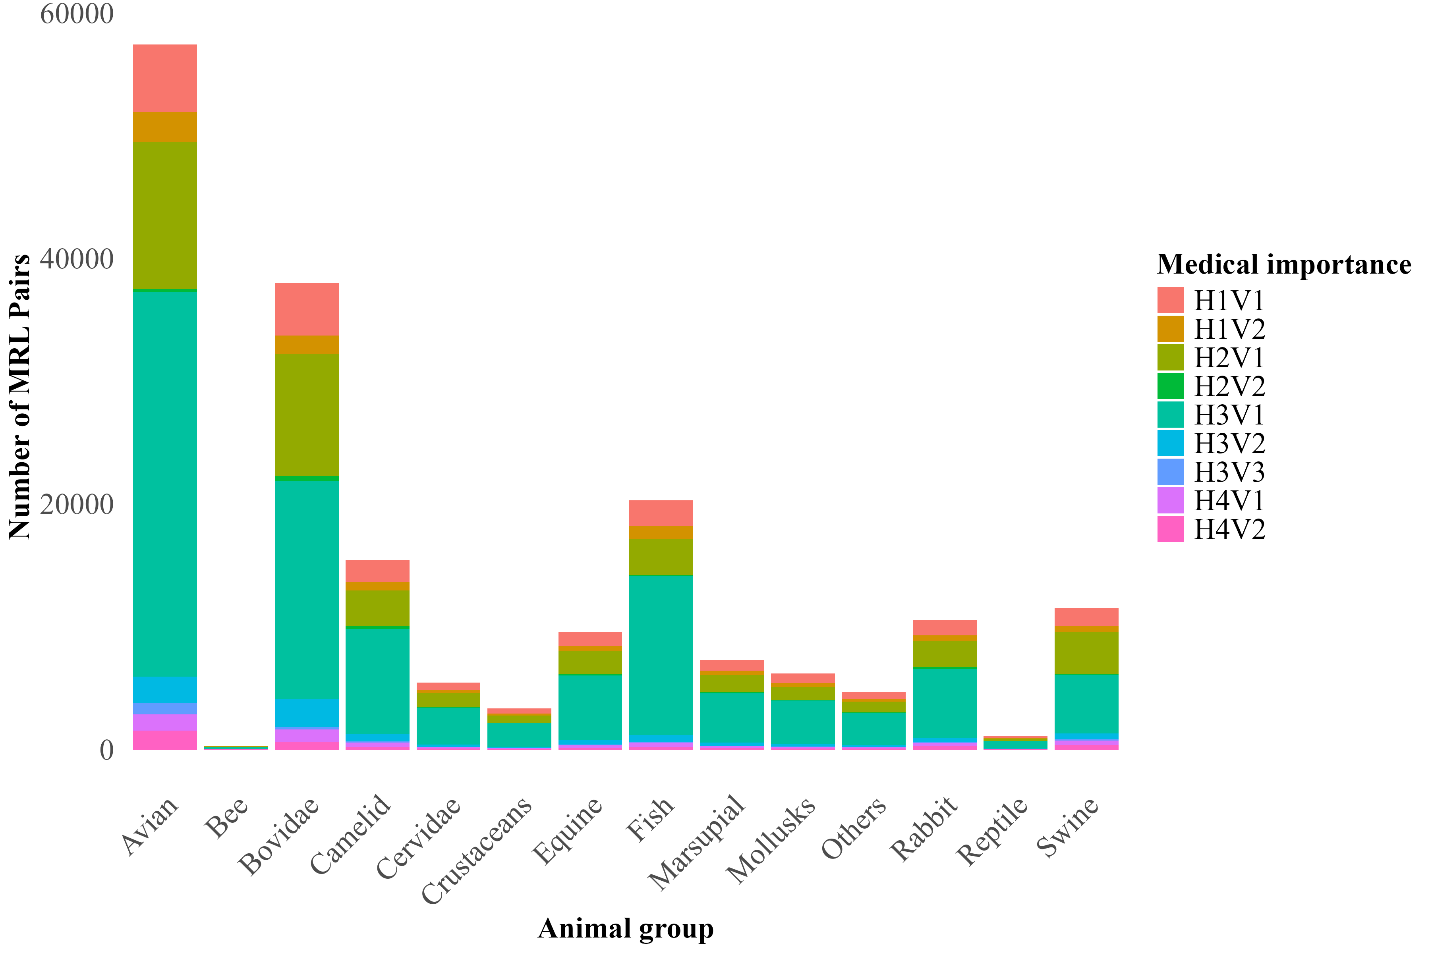


**Figure B1. Medically important antimicrobials by animal group.**

**Table B2. Number of MRLs by Aggregate Animal Group**

| **Animal group** | **H1V1** | **H1V2** | **H1V3** | **H2V1** | **H2V2** | **H2V3** | **H3V1** | **H3V2** | **H3V3** | **H4V1** | **H4V2** | **H4V3** |
| --- | --- | --- | --- | --- | --- | --- | --- | --- | --- | --- | --- | --- |
| Avian | 9.6(5526) | 4.2(2406) | n.d. | 20.9(12019) | 0.4(204) | n.d. | 54.6(31363) | 3.7(2144) | 1.6(919) | 2.3(1322) | 2.7(1551) | n.d. |
| Bee | 11.6(35) | 4(12) | n.d. | 24.1(73) | 1.3(4) | n.d. | 42.9(130) | 10.6(32) | 1(3) | 1(3) | 3.6(11) | n.d. |
| Bovidae | 11.3(4279) | 4(1517) | n.d. | 26.1(9906) | 1.1(411) | n.d. | 46.7(17748) | 6.1(2324) | 0.5(183) | 2.7(1045) | 1.5(589) | n.d. |
| Camelid | 11.6(1780) | 4.4(673) | n.d. | 18.9(2908) | 1.6(241) | n.d. | 55.6(8574) | 3.8(583) | 0.5(72) | 2.3(353) | 1.5(225) | n.d. |
| Cervidae | 11.2(612) | 4.4(239) | n.d. | 20.5(1121) | 1.4(78) | n.d. | 54.9(2997) | 3.6(197) | 0.4(24) | 2.1(112) | 1.4(78) | n.d. |
| Crustaceans | 12.1(405) | 5.5(183) | n.d. | 16.8(562) | 0.4(12) | n.d. | 58.5(1954) | 3.2(108) | 0.2(6) | 2.3(78) | 1(33) | n.d. |
| Equine | 12.1(1165) | 4.3(413) | n.d. | 19.2(1843) | 1.6(150) | n.d. | 54.9(5265) | 3.8(363) | 0.4(42) | 2.3(216) | 1.4(136) | n.d. |
| Fish | 10.3(2100) | 5.2(1055) | n.d. | 14.5(2938) | 0.3(60) | n.d. | 63.8(12964) | 2.9(590) | 0.1(30) | 1.9(390) | 0.9(180) | n.d. |
| Marsupial | 11.9(870) | 4.6(336) | n.d. | 19(1383) | 1.6(120) | n.d. | 54.9(3994) | 3.7(272) | 0.5(34) | 2.2(162) | 1.5(110) | n.d. |
| Mollusks | 12.3(762) | 5.3(330) | n.d. | 17.5(1080) | 0.4(24) | n.d. | 57.3(3549) | 3.4(210) | 0.2(12) | 2.5(156) | 1.1(66) | n.d. |
| Others | 12(562) | 4.8(223) | n.d. | 18.6(872) | 1.4(64) | n.d. | 55.6(2608) | 3.6(171) | 0.4(19) | 2.3(107) | 1.4(66) | n.d. |
| Rabbit | 11.7(1232) | 4.4(468) | n.d. | 20(2104) | 1.6(165) | n.d. | 53.2(5609) | 3.5(370) | 0.4(47) | 2.1(218) | 3.1(323) | n.d. |
| Reptile | 11.8(127) | 5.2(56) | n.d. | 16.8(180) | 0.4(4) | n.d. | 58.9(632) | 3.3(35) | 0.2(2) | 2.4(26) | 1(11) | n.d. |
| Swine | 12.7(1458) | 4.3(491) | n.d. | 29.5(3399) | 0.8(90) | n.d. | 41.4(4768) | 4(456) | 1.2(143) | 3.1(356) | 3.1(361) | n.d. |

Source: Authors’ compilation. The commodities included in each animal group are as follow: Avian includes chicken, duck, eggs, emu, goose, guinea-fowl, ostrich, partridge, pheasant, pigeon, quail, turkey. Bee includes Honey. Bovidae consists of buffalo, cattle, goat, sheep and their milk products. Camelid includes alpaca, camel meat and its milk product, llama. Cervidae comprises deer. Crustaceans include crab, lobster, prawn/shrimp. Equine group includes donkey, horse and its milk product. Fish are barramundi, carp, catfish, eel, flatfish, rockfish, salmon, sea bream, sturgeon, sweetfish, tilapia, trout, tuna, and yellowtail. Marsupial includes possum, and wallaby. Mollusks are abalone, clam, cockle, mussel, oyster, and scallop. Rabbit includes hare, and rabbit. Swine contains swine products. Reptiles include turtle. Others are frog and kangaroo commodities. Empty cells are pairs of animal groups and medical importance levels with no MRL pairs.

**Appendix C**


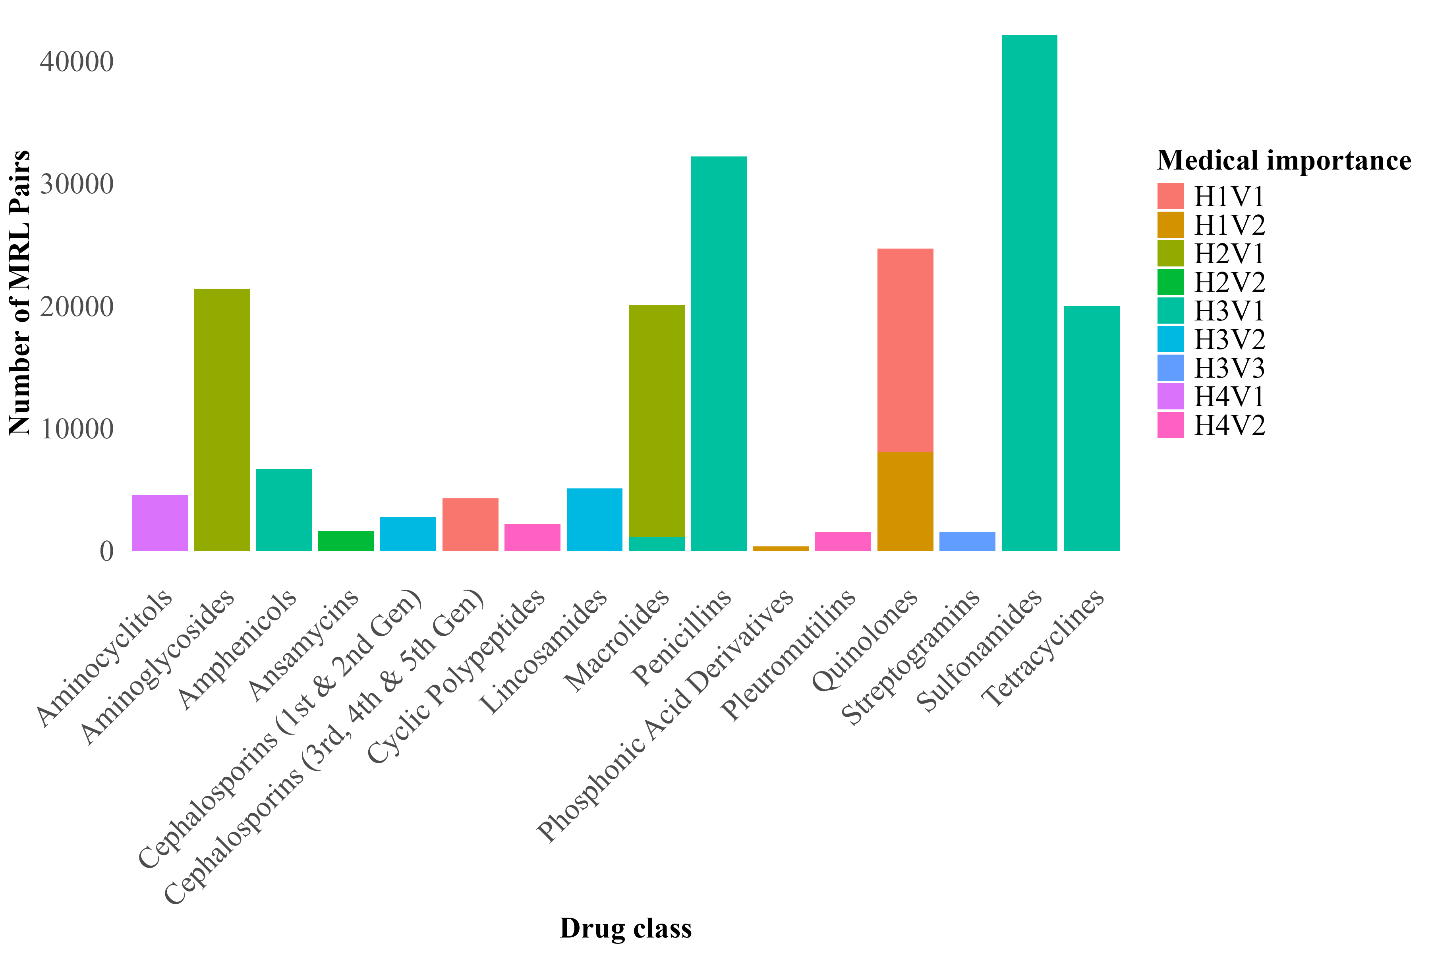


**Figure C1. Medically important antimicrobials by drug class.**

**Table C1. Share of MRL pairs by medical importance by drug class**

| **Drug class** | **H1V1** | **H1V2** | **H1V3** | **H2V1** | **H2V2** | **H2V3** | **H3V1** | **H3V2** | **H3V3** | **H4V1** | **H4V2** | **H4V3** |
| --- | --- | --- | --- | --- | --- | --- | --- | --- | --- | --- | --- | --- |
| Aminocyclitols |  |  |  |  |  |  |  |  |  | 2.4(4,544) |  |  |
| Aminoglycosides |  |  |  | 11.2 (21,408) |  |  |  |  |  |  |  |  |
| Amphenicols |  |  |  |  |  |  | 3.5(6,695) |  |  |  |  |  |
| Ansamycins |  |  |  |  | 0.9(1,627) |  |  |  |  |  |  |  |
| Cephalosporins (1st- & 2nd-Gens) |  |  |  |  |  |  |  | 1.4(2,760) |  |  |  |  |
| Cephalosporins (3rd-, 4th- & 5th-Gens) | 2.2(4,274) |  |  |  |  |  |  |  |  |  |  |  |
| Cyclic Polypeptides |  |  |  |  |  |  |  |  |  |  | 1.1(2,172) |  |
| Lincosamides |  |  |  |  |  |  |  | 2.7(5,095) |  |  |  |  |
| Macrolides |  |  |  | 9.9(18,980) |  |  | 0.6(1,098) |  |  |  |  |  |
| Penicillins |  |  |  |  |  |  | 16.8(32,209) |  |  |  |  |  |
| Phosphonic Acid Derivatives |  | 0.2(343) |  |  |  |  |  |  |  |  |  |  |
| Pleuromutilins |  |  |  |  |  |  |  |  |  |  | 0.8(1,568) |  |
| Quinolones | 8.7(16,639) | 4.2(8,059) |  |  |  |  |  |  |  |  |  |  |
| Streptogramins |  |  |  |  |  |  |  |  | 0.8(1,536) |  |  |  |
| Sulfonamides |  |  |  |  |  |  | 22.1(42,160) |  |  |  |  |  |
| Tetracyclines |  |  |  |  |  |  | 10.5(19,993) |  |  |  |  |  |

Source: Authors’ compilation. In parentheses are the number of MRL pairs for each drug class. For Cephalosporins, the 1st and 2nd generations have different medical importance levels (H3V2) from the 3rd-5th generations (H1V1). Also, Quinolones agents differ in human importance levels. Empty cells are pairs of drug class and medical importance levels with no MRL pairs.

**Appendix D**

**
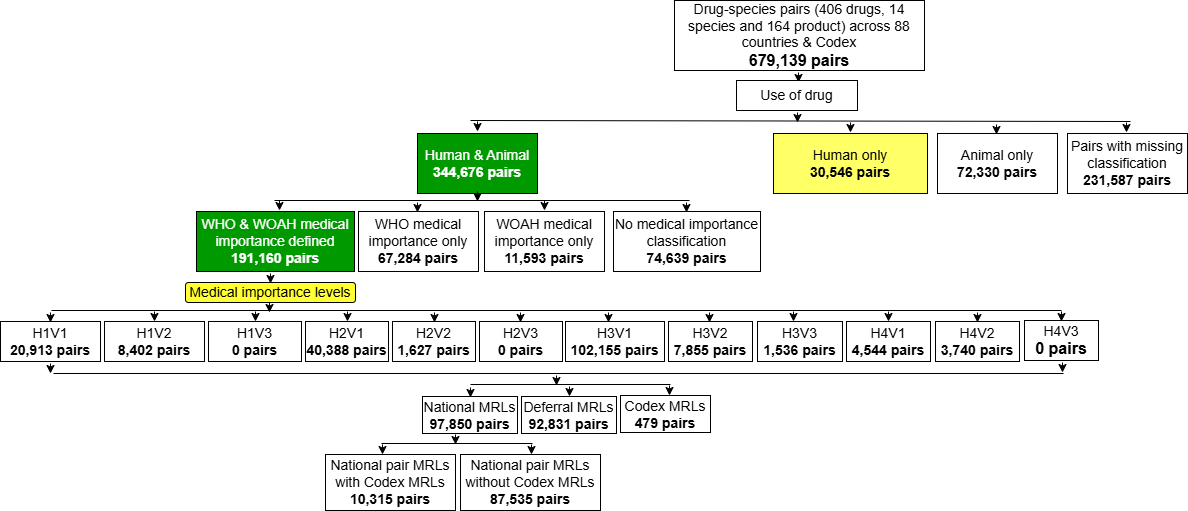
**

**Figure D. Distribution of MRL pairs by existence of Codex standards.**

Source: Authors calculations using data from Okunola et al. (2025)

**Appendix E. One Health Scores**


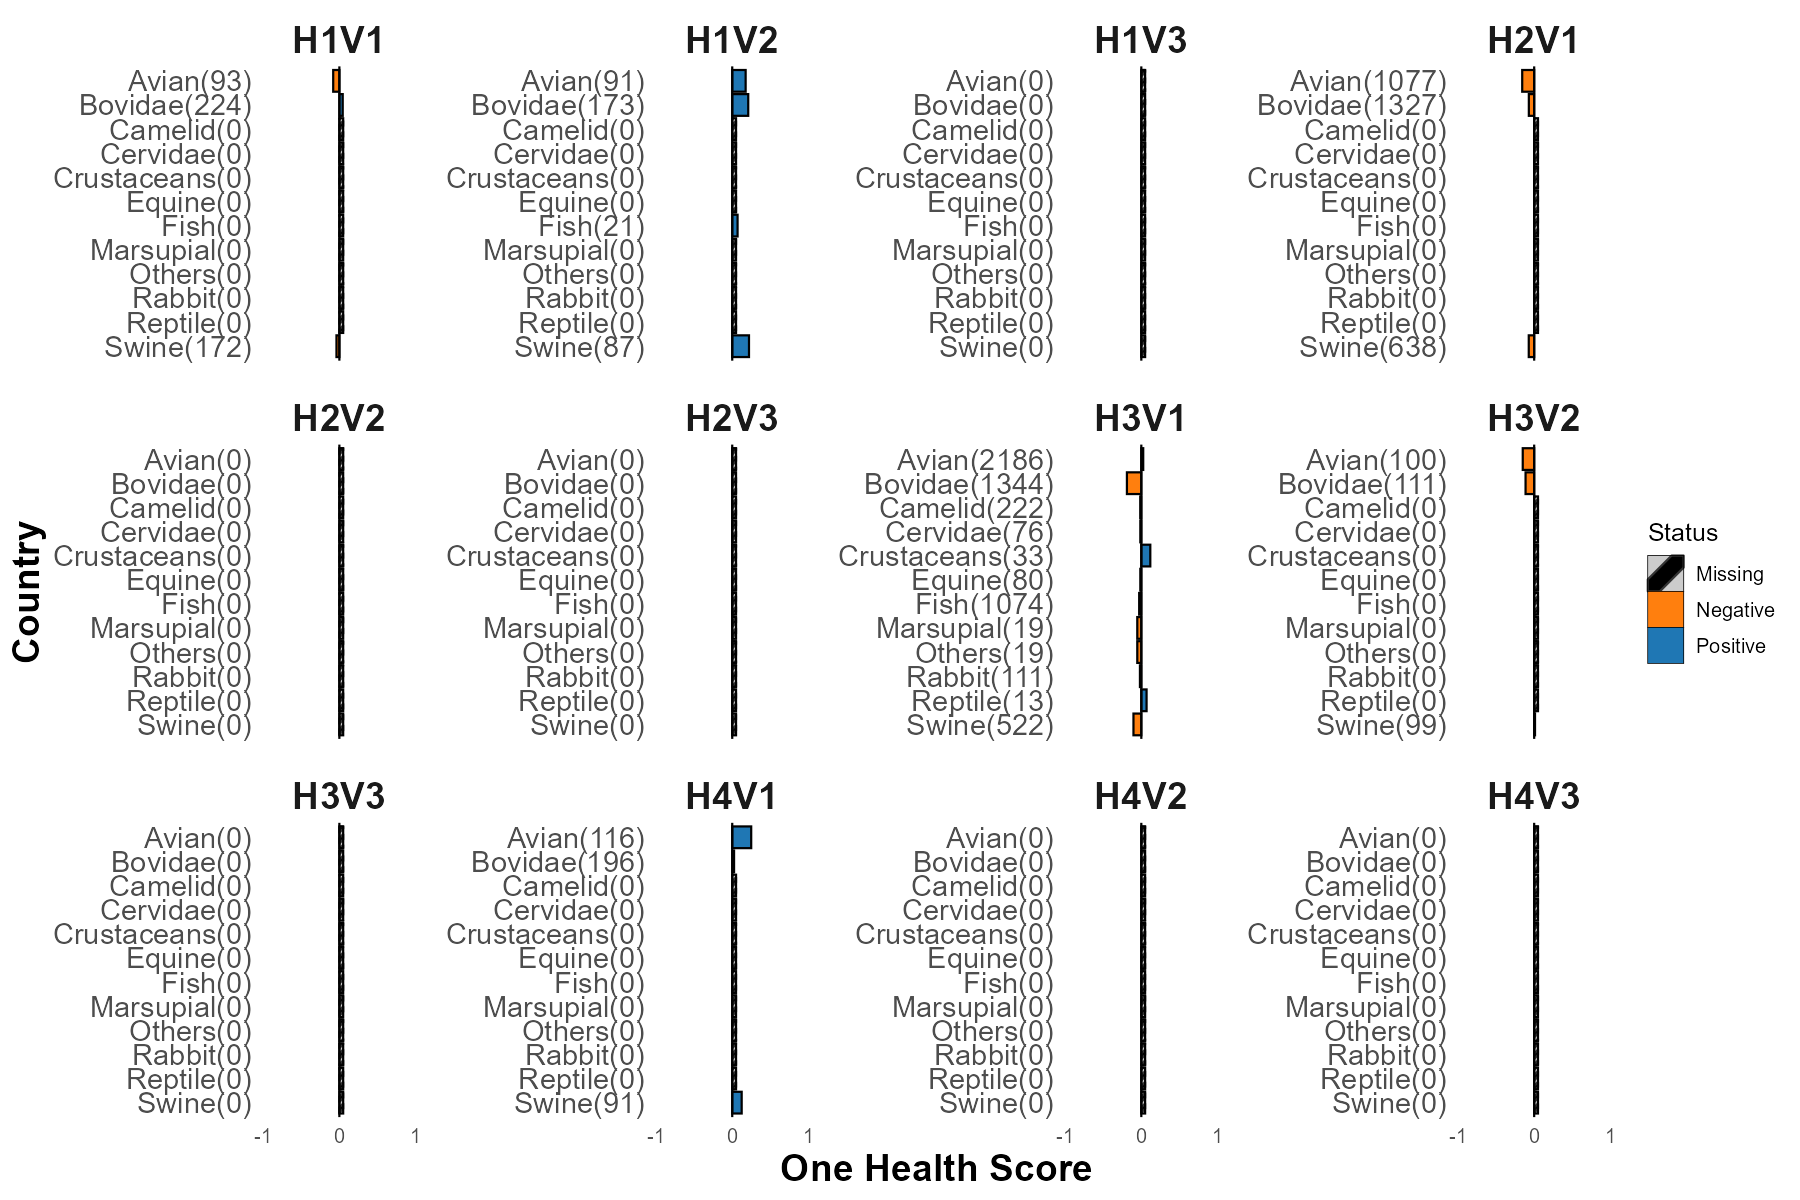
**Figure E1. Regulatory compliance with Codex by animal group.**

Number of drug-product MRL pairs in parenthesis. Grey bars indicate animal groups without MRL pairs within medical importance level.

**Table E2. Aggregate regulatory indices by animal group and medical importance.**

| **Animal group** | **One Health Score** | | | | | | | | | | |  |
| --- | --- | --- | --- | --- | --- | --- | --- | --- | --- | --- | --- | --- |
| **H1V1** | **H1V2** | | **H2V1** | | **H3V1** | | **H3V2** | | **H4V1** | | **Overall** |
| Avian | –0.08 | | 0.18 | | –0.16 | | 0.03 | | –0.15 | | 0.25 | -0.025 |
| Bee |  | |  | |  | |  | |  | |  |  |
| Bovidae | 0.04 | | 0.21 | | –0.07 | | –0.19 | | –0.11 | | 0.02 | -0.092 |
| Camelid |  | |  | |  | | –0.01 | |  | |  | -0.014 |
| Cervidae |  | |  | |  | | –0.01 | |  | |  | -0.013 |
| Crustaceans |  | |  | |  | | 0.12 | |  | |  | 0.118 |
| Equine |  | |  | |  | | –0.01 | |  | |  | -0.013 |
| Fish |  | | 0.07 | |  | | –0.03 | |  | |  | -0.026 |
| Marsupial |  | |  | |  | | –0.05 | |  | |  | -0.053 |
| Mollusks |  | |  | |  | |  | |  | |  |  |
| Others |  | |  | |  | | –0.05 | |  | |  | -0.053 |
| Rabbit |  | |  | |  | | –0.02 | |  | |  | -0.018 |
| Reptile |  | |  | |  | | 0.07 | |  | |  | 0.069 |
| Swine | –0.04 | | 0.22 | | -0.07 | | –0.10 | | 0.01 | | 0.12 | -0.046 |

Source: Authors’ computation.

**Appendix F**


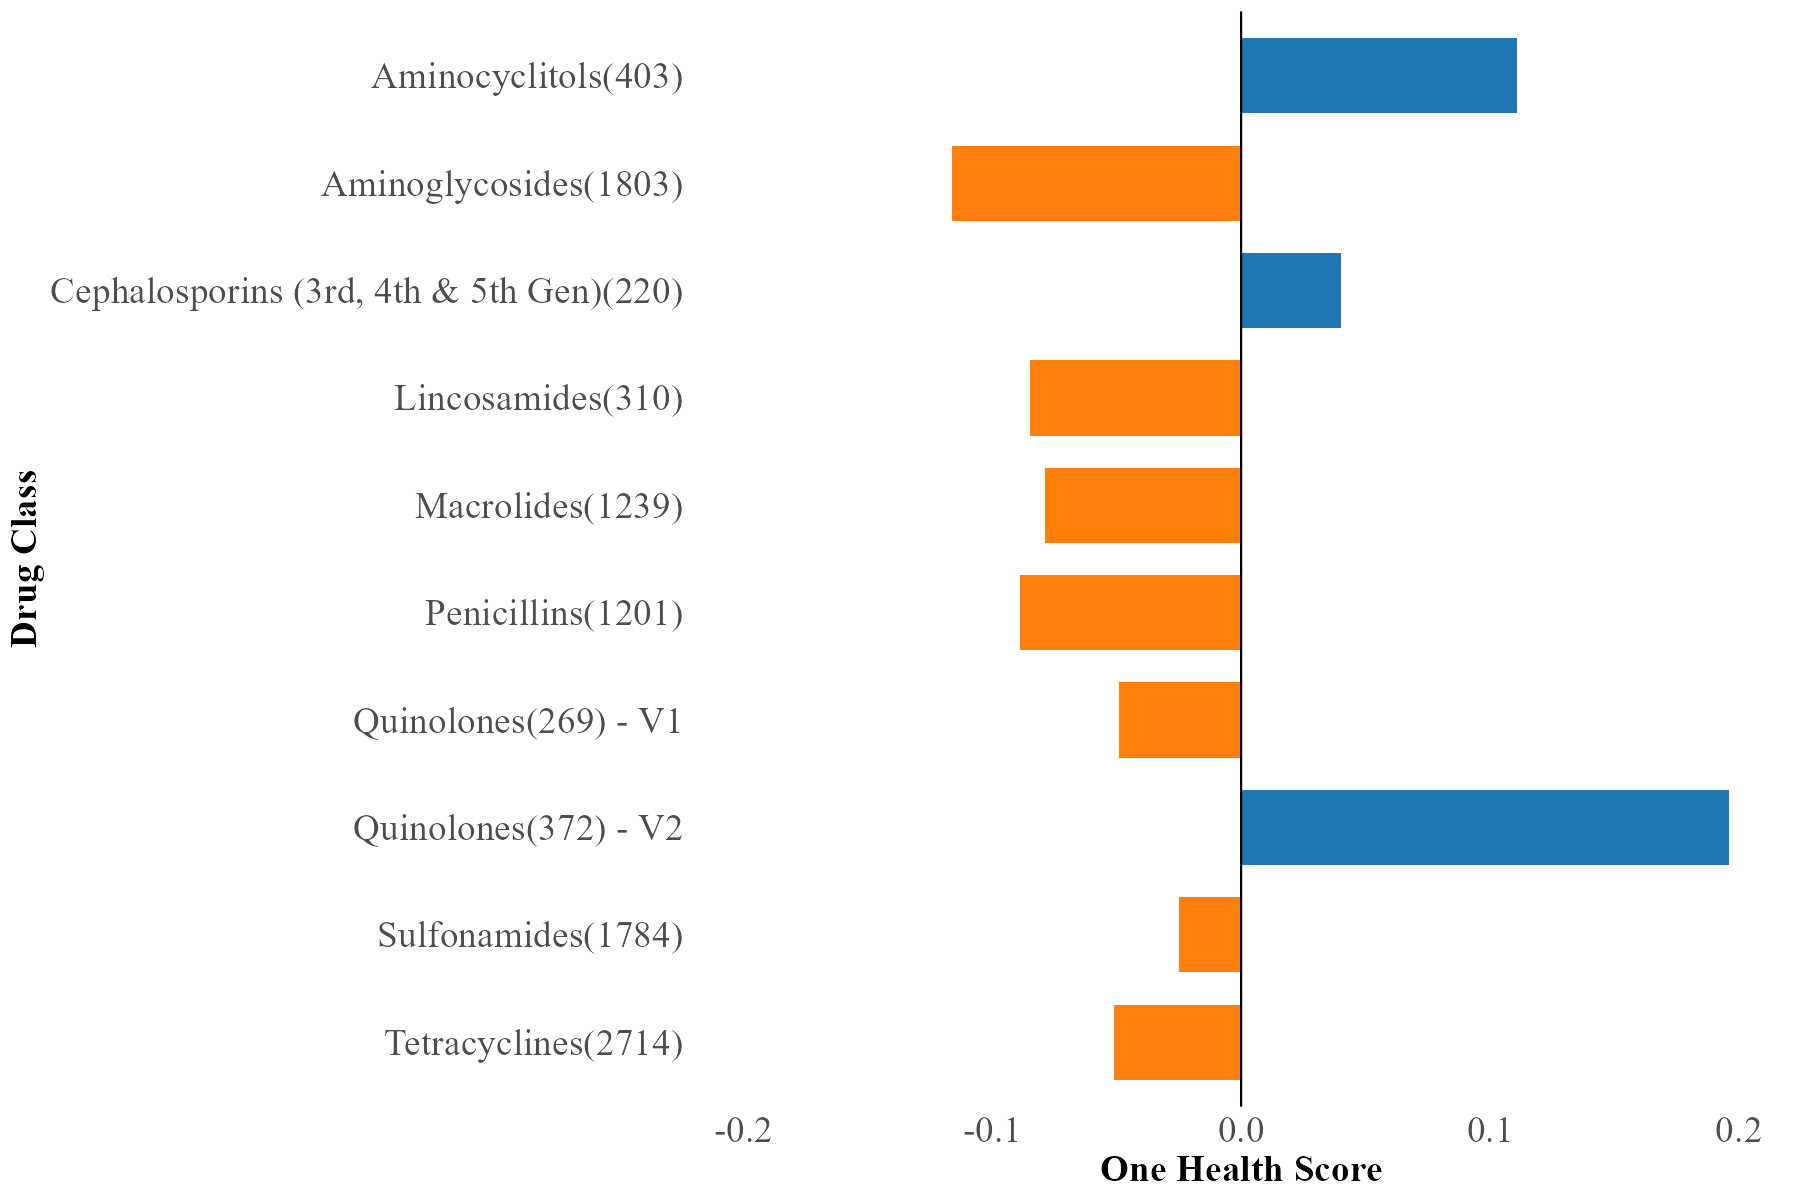


**Figure F1. Regulatory compliance with Codex by drug class.**

Number of drug-product MRL pairs in parenthesis.

**Table F2. Aggregate regulatory indices by drug class and medical importance.**

| **Drug class** | **H1V1** | **H1V2** | **H1V3** | **H2V1** | **H2V2** | **H2V3** | **H3V1** | **H3V2** | **H3V3** | **H4V1** | **H4V2** | **H4V3** |
| --- | --- | --- | --- | --- | --- | --- | --- | --- | --- | --- | --- | --- |
| Aminocyclitols |  |  |  |  |  |  |  |  |  | 0.111(403) |  |  |
| Aminoglycosides |  |  |  | -0.116(1803) |  |  |  |  |  |  |  |  |
| Cephalosporins (3rd, 4th & 5th Gen) | 0.04(220) |  |  |  |  |  |  |  |  |  |  |  |
| Lincosamides |  |  |  |  |  |  |  | -0.085(310) |  |  |  |  |
| Macrolides |  |  |  | -0.079(1239) |  |  |  |  |  |  |  |  |
| Penicillins |  |  |  |  |  |  | -0.089(1201) |  |  |  |  |  |
| Quinolones | -0.049(269) | 0.196(372) |  |  |  |  |  |  |  |  |  |  |
| Sulfonamides |  |  |  |  |  |  | -0.025(1784) |  |  |  |  |  |
| Tetracyclines |  |  |  |  |  |  | -0.051(2714) |  |  |  |  |  |

Source: Authors’ computation. One Health Score of zero implies aggregate compliance with international standards. Empty cells are pairs of class and medical importance without MRL pairs with both national and Codex MRLs.

**Appendix G**

**Table G1. Aggregate regulatory compliance by country and medical importance levels.**

| **Country** | **One Health Score** | | | | | |  |
| --- | --- | --- | --- | --- | --- | --- | --- |
| **HIV1** | **H1V2** | **H2V1** | **H3V1** | **H3V2** | **H4V1** | **Overall** |
| Argentina | 0.00 | 0.00 | 0.03 | -0.20 | 0.00 | 0.00 | -0.115 |
| Australia | 0.46 | 0.00 | -0.07 | 0.11 | 0.01 | 0.01 | 0.067 |
| Brazil | 0.00 | 0.00 | -0.02 | -0.02 | 0.00 | 0.00 | -0.023 |
| Canada | 0.14 | 0.00 | -0.19 | 0.05 | 0.92 | 0.92 | -0.068 |
| Chile | 0.00 | 0.00 | 0.03 | 0.00 | 0.00 | 0.00 | -0.001 |
| China | 0.00 | 0.00 | -0.54 | 0.02 | 0.00 | 0.00 | -0.14 |
| Colombia | 0.00 | 0.00 | -0.15 | 0.00 | 0.00 | 0.00 | -0.055 |
| Egypt | 0.00 | 0.37 | 0.02 | 0.21 | 0.36 | 0.36 | 0.154 |
| Eurasian Econ. Union | -0.12 | 0.20 | 0.03 | 0.00 | 0.36 | 0.36 | 0.029 |
| European Union | -0.12 | 0.37 | -0.57 | 0.21 | 0.36 | 0.36 | -0.012 |
| Gulf Coop. Council | 0.29 | 0.00 | 0.08 | 0.18 | 0.50 | 0.50 | 0.157 |
| Hong Kong | 0.00 | 0.00 | -0.40 | 0.21 | 0.00 | 0.00 | 0.07 |
| India | 0.00 | 0.00 | 0.00 | 0.08 | 0.00 | 0.00 | 0.046 |
| Indonesia | n.d. | 0.00 | 0.34 | 0.01 | -2.90 | -2.90 | -0.071 |
| Japan | 0.00 | -0.01 | 0.02 | 0.09 | 0.00 | 0.00 | 0.041 |
| Korea | 0.00 | 0.38 | 0.00 | -0.01 | 0.00 | 0.00 | 0.009 |
| Macau | 0.00 | 0.00 | -0.03 | 0.00 | 0.00 | 0.00 | -0.006 |
| Malaysia | -0.52 | 0.89 | -0.08 | 0.16 | 0.27 | 0.27 | 0.081 |
| Mexico | 0.00 | -0.02 | 0.02 | 0.00 | n.d. | n.d. | 0.003 |
| New Zealand | 0.17 | 0.86 | 0.24 | -0.19 | 0.69 | 0.69 | 0.034 |
| Peru | 0.00 | 0.00 | 0.04 | 0.00 | 0.00 | 0.00 | 0.011 |
| Singapore | 0.00 | 0.00 | -0.01 | -0.02 | n.d. | n.d. | -0.013 |
| South Africa | 0.00 | 0.99 | 0.32 | 0.09 | 0.66 | 0.66 | 0.211 |
| Taiwan | 0.00 | 0.05 | 0.01 | 0.07 | -0.08 | -0.08 | 0.033 |
| Thailand | 0.00 | 0.00 | 0.00 | 0.00 | 0.00 | 0.00 | -0.003 |
| Turkey | -0.12 | 0.37 | -0.57 | 0.21 | 0.36 | 0.36 | -0.012 |
| United States | 0.10 | 0.00 | -1.72 | -6.34 | 0.12 | 0.12 | -3.635 |
| Vietnam | 0.00 | 0.00 | -0.02 | 0.00 | 0.00 | 0.00 | -0.005 |

Source: Authors’ computation. One Health Score of zero implies aggregate compliance with international standards; n.d. implies no observations

**Appendix H**
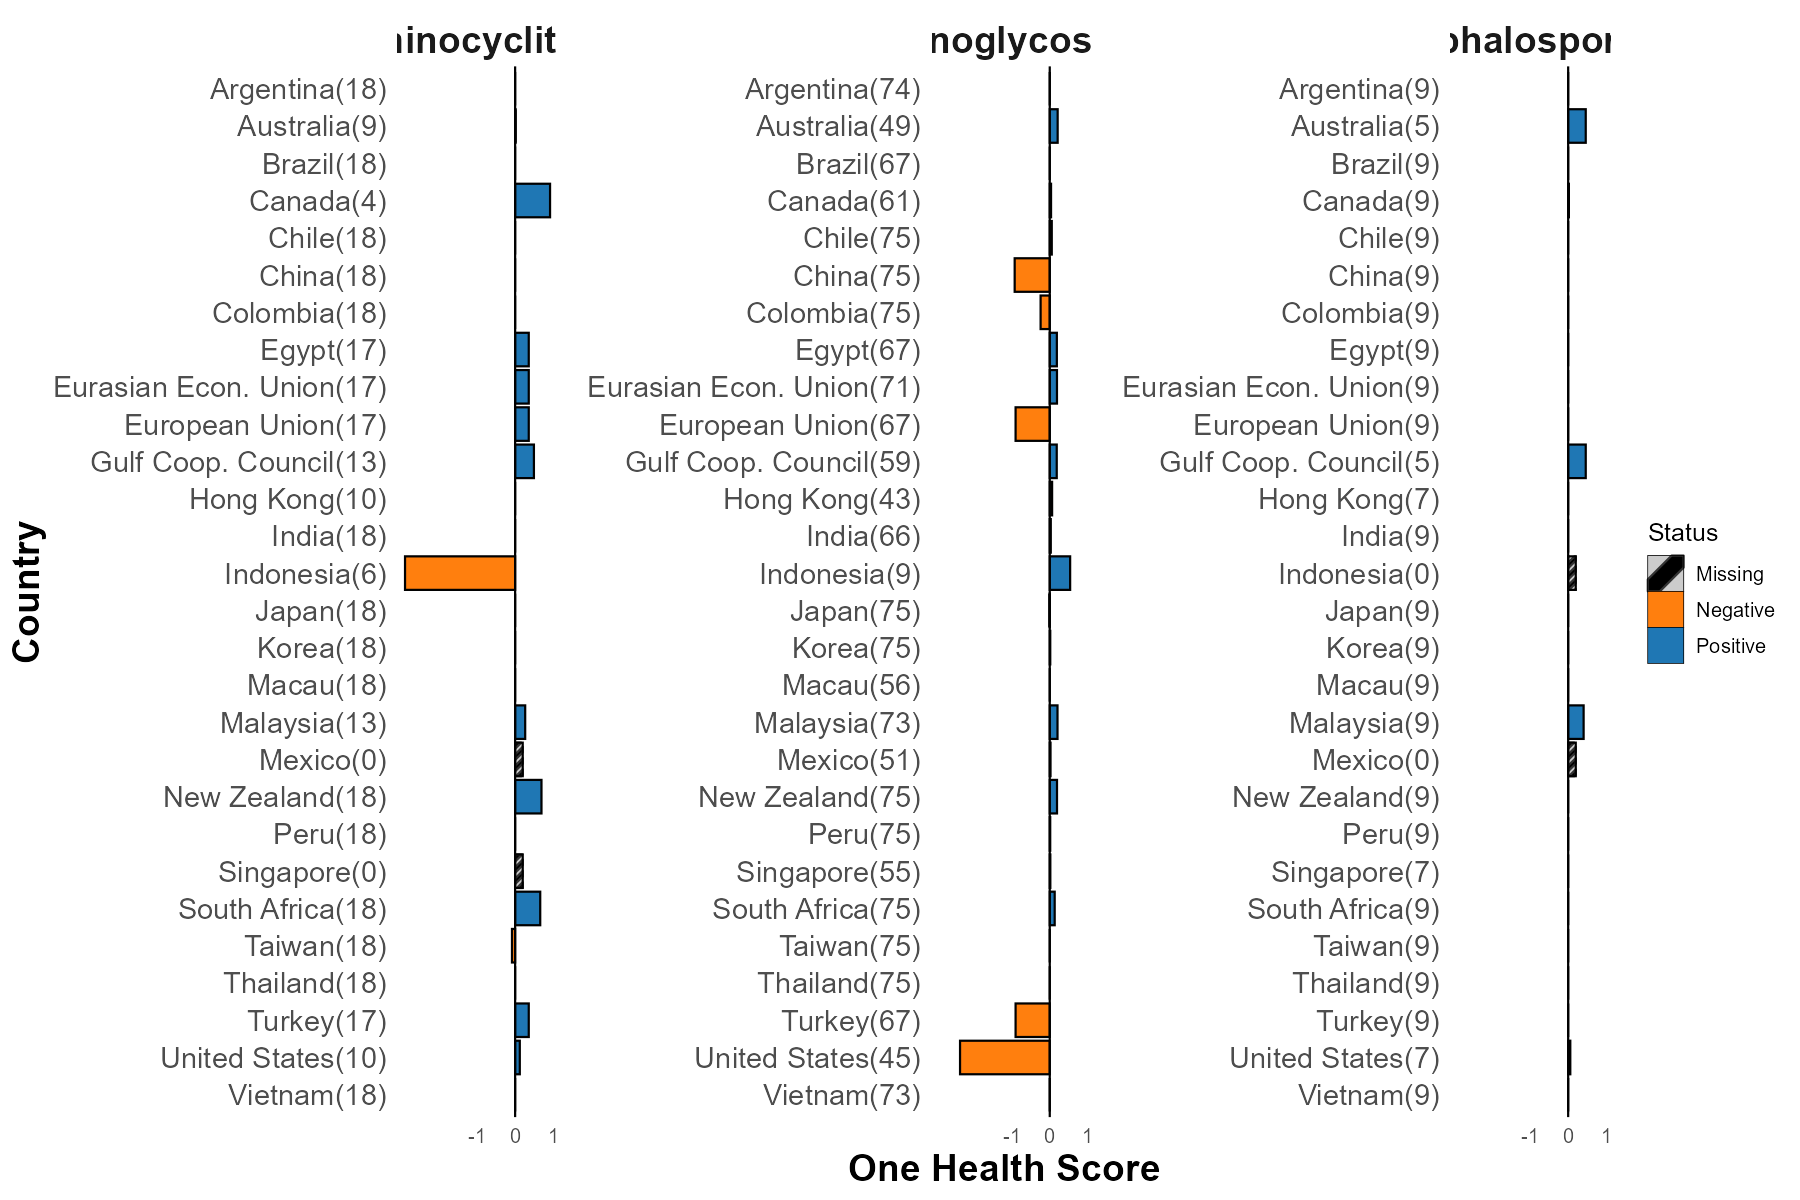


**Figure H. Regulatory compliance with Codex by country and drug class.**

Note: Number of drug-product MRL pairs in parenthesis. Countries with MRL pair observations but without bars have OHS of zero and are on aggregate compliant with Codex. Grey bars indicate countries without MRL pairs within drug class.


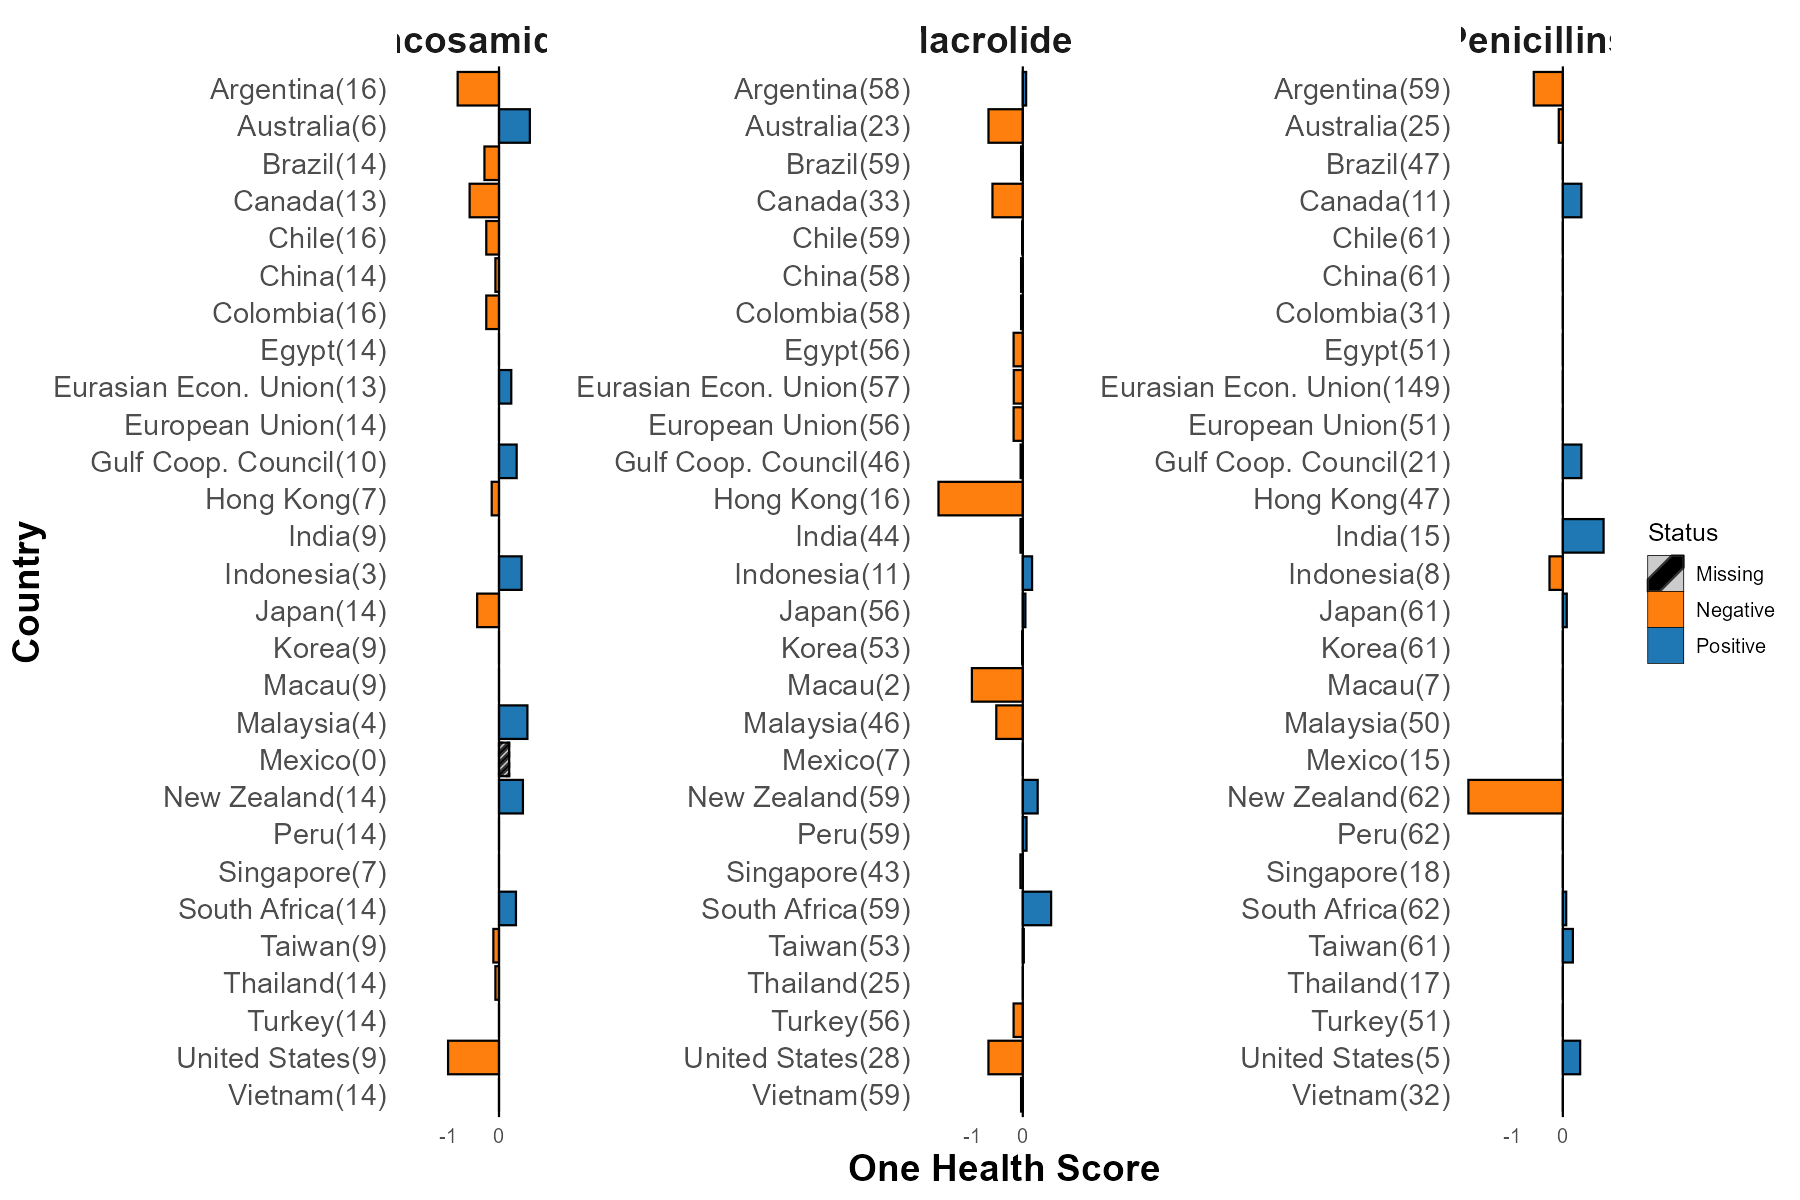


**Figure H continued...**

Note: Number of drug-product MRL pairs in parenthesis. Countries with MRL pair observations but without bars have OHS of zero and are on aggregate compliant with Codex. Grey bars indicate countries without MRL pairs within the drug class.


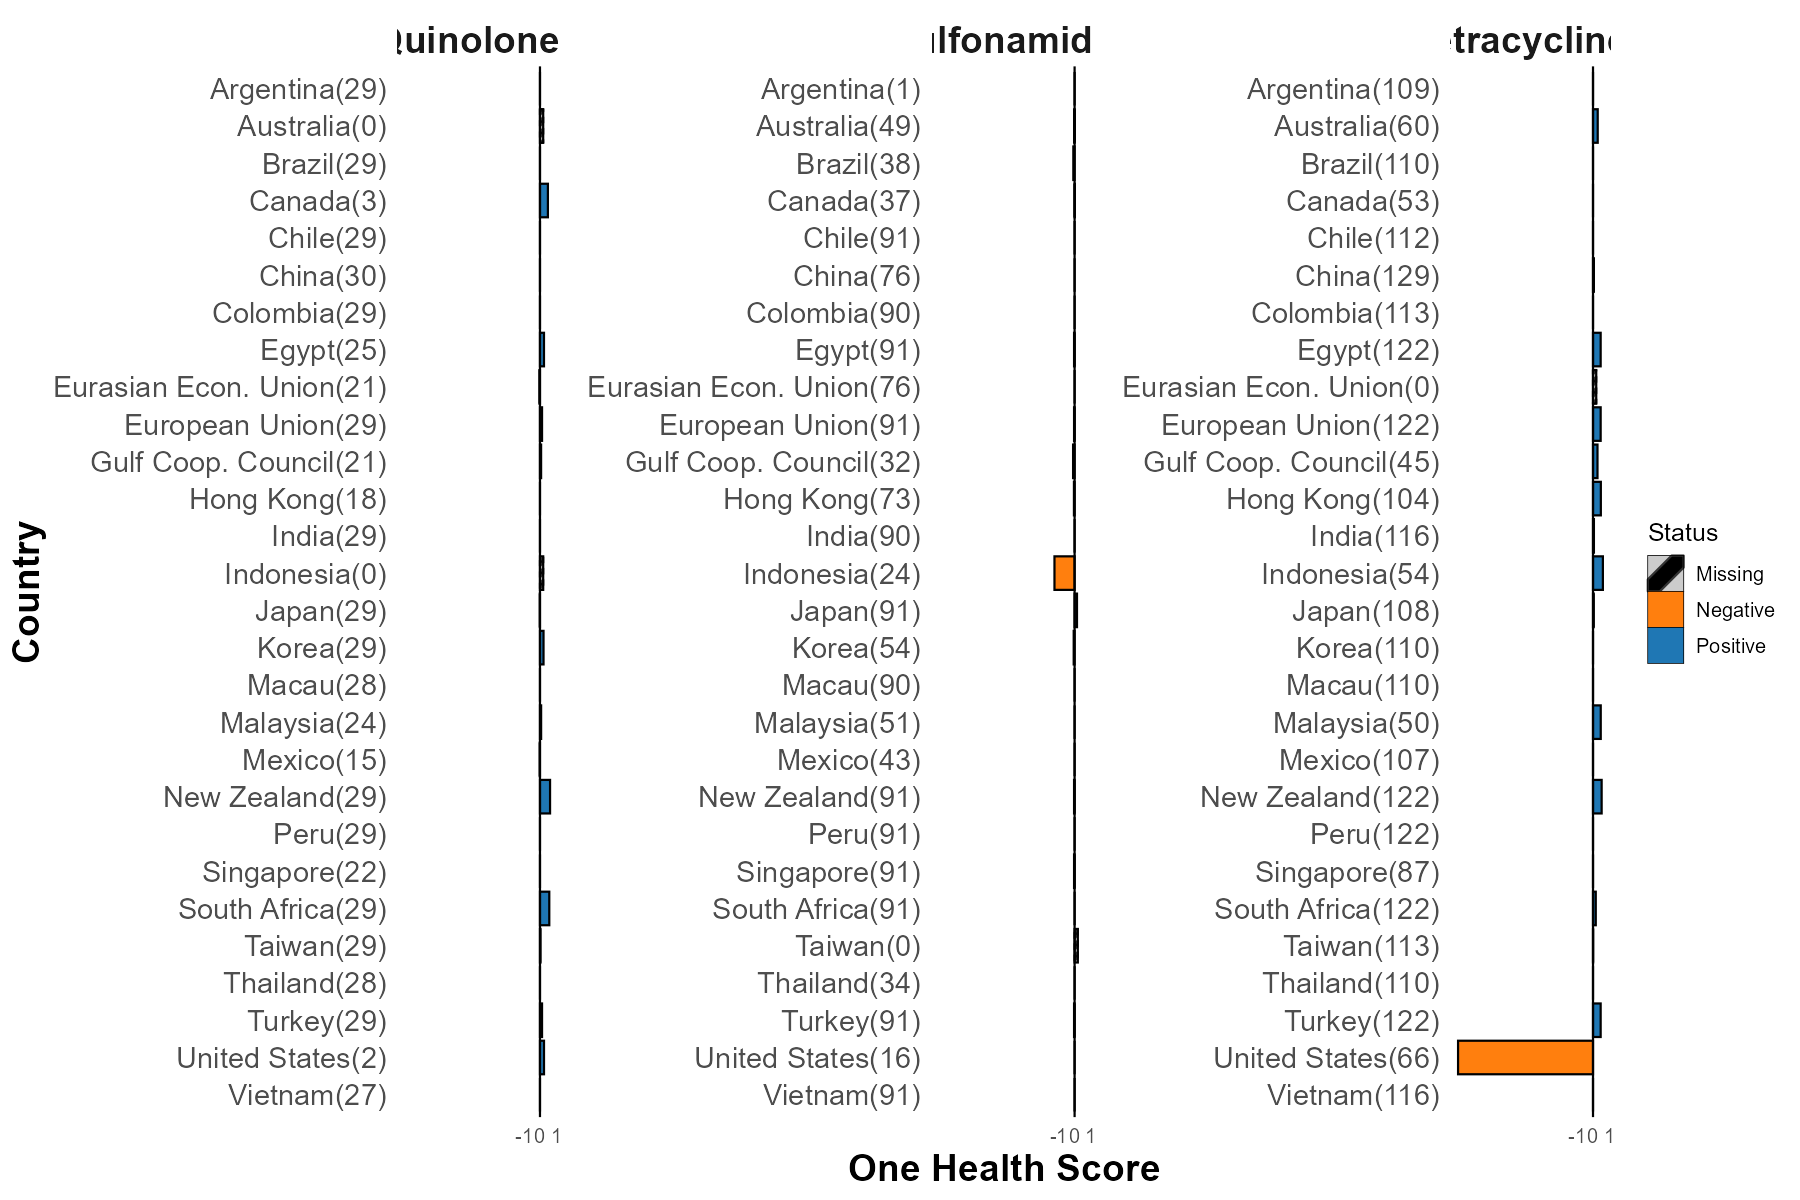


**Figure H continued...**

Note: Number of drug-product MRL pairs in parenthesis. Countries with MRL pair observations but without bars have OHS of zero and are on aggregate compliant with Codex. Grey bars indicate countries without MRL pairs within the drug class.
